# Supplementary material for: Long-Term Effects of Perinatal Exposure to a Glyphosate-Based Herbicide on Melatonin Levels and Oxidative Brain Damage in Adult Male Rats
Source: MDPI journal article supplement (doi:10.3390/antiox12101825), 2023-10-03
Supplement: s1 [file s1]

**Table S1.** List of primary antibodies used for immunofluorescence analysis.

| <b>Antibody</b> | <b>Brand</b> | <b>Cat. number</b> | <b>Dilution</b> | <b>Description</b>                                     |
|-----------------|--------------|--------------------|-----------------|--------------------------------------------------------|
| 4HNE            | Abcam        | Ab46544            | 1:50            | Goat polyclonal to 4 Hydroxynonenal                    |
| 8-OH-dG         | Abcam        | Ab62623            | 1:400           | Mouse monoclonal (15A3) to DNA/RNA damage              |
| SOD1            | Invitrogen   | PA5-27240          | 1:1000          | Rabbit polyclonal to SOD1                              |
| GCLC            | Invitrogen   | PA5-44189          | 1:500           | Mouse polyclonal to GCLC                               |
| GPx1            | Invitrogen   | PA1-18279          | 1:1000          | Sheep polyclonal antibody to GPX1                      |
| NeuN            | Abcam        | Ab177487           | 1:500           | Rabbit monoclonal (EPR12763) to NeuN – Neuronal Marker |
| GFAP            | Abcam        | Ab4674             | 1:1000          | Chicken polyclonal to GFAP                             |
| TH              | Abcam        | Ab6211             | 1:500           | Rabbit polyclonal to Tyrosine Hydroxylase              |

**Table S2.** List of secondary antibodies used for immunofluorescence analysis.

| <b>Secondary antibody</b> | <b>Brand</b> | <b>Cat. Number</b> | <b>Dilution</b> | <b>Fluorescence</b>   | <b>Primary Ab</b> |
|---------------------------|--------------|--------------------|-----------------|-----------------------|-------------------|
| Donkey anti-Goat IgG      | Invitrogen   | A32814             | 1:1000          | Alexa Fluor™ Plus 488 | HNE               |
| Goat anti-mouse IgG       | Invitrogen   | A11029             | 1:500           | Alexa Fluor™ 488      | 8-OH-dG           |
| Donkey anti-mouse IgG     | Abcam        | Ab150105           | 1:500           | Alexa Fluor® 488      | 8-OH-dG           |
| Donkey anti-rabbit IgG    | Abcam        | Ab150074           | 1:1000          | Alexa Fluor® 555      | GCLC              |
| Donkey anti-sheep IgG     | Invitrogen   | A21448             | 1:500           | Alexa Fluor™ 647      | GPx1              |
| Goat anti-rabbit IgG      | Invitrogen   | A11034             | 1:500           | Alexa Fluor™ 488      | NeuN              |
| Goat anti-chicken IgY     | Invitrogen   | A21449             | 1:1500          | Alexa Fluor™ 647      | GFAP              |
| Goat anti-rabbit IgG      | Invitrogen   | A32732             | 1:500           | Alexa Fluor™ Plus 555 | TH and SOD1       |
